# Supplementary material for: Fishmeal Replacement with Hermetia illucens Meal in Aquafeeds: Effects on Zebrafish Growth Performances, Intestinal Morphometry, and Enzymology
Source: MDPI journal article supplement (doi:10.3390/fishes6030028), 2021-08-05
Supplement: s1 [file s1]

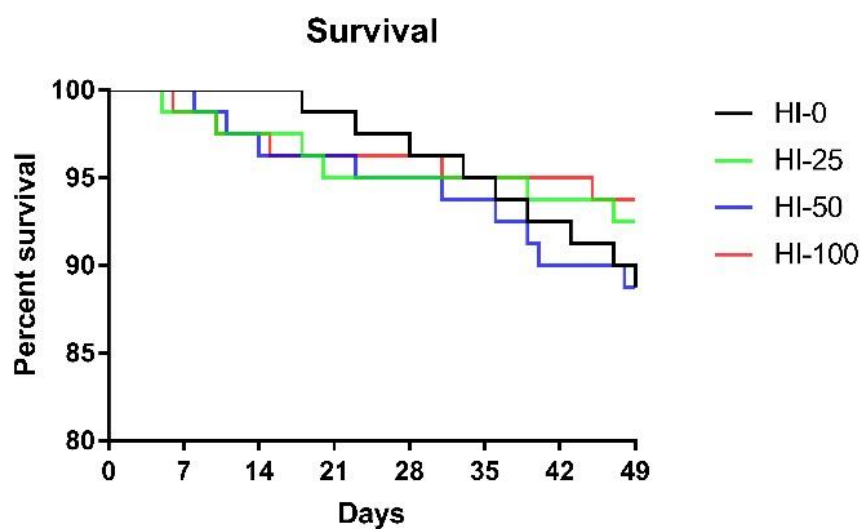

**Figure S1.** Curves of fish survival\* in relation to treatments and time.

\* Curves are represented according to the Kaplan-Meier method and compared by mean log-rank test. No differences between treatments were observed ( $P > 0.05$ )
